# Supplementary material
Source: PubMed Central journal article supplement (PMC5975206)
Supplement: NIHMS954546-supplement-Supplementary_Information_1.pdf [file NIHMS954546-supplement-Supplementary_Information_1.pdf]

*Electronic Supplementary Information*

**Site-specific characterization and quantitation of N-glycopeptides in PKM2 knockout breast cancer cells using DiLeu isobaric tags enabled by electron-transfer/higher-energy collision dissociation (ETHcD)**

Zhengwei Chen,<sup>1#</sup> Qing Yu,<sup>2#</sup> Ling Hao,<sup>2</sup> Fabao Liu,<sup>3</sup> Jillian Johnson,<sup>2</sup> Zichuan Tian,<sup>1</sup> W. John Kao,<sup>2</sup> Wei Xu,<sup>3,\*</sup> Lingjun Li<sup>1,2,4,\*</sup>

<sup>1</sup>Department of Chemistry, University of Wisconsin, Madison, WI 53705, USA

<sup>2</sup>School of Pharmacy, University of Wisconsin, Madison, WI 53705, USA

<sup>3</sup>McArdle Laboratory for Cancer Research, University of Wisconsin, Madison, WI 53705, USA

<sup>4</sup>School of Life Sciences, Tianjin University, Tianjin, 300072, P.R. China

---

**\*Correspondence:** Professor Lingjun Li, School of Pharmacy and Department of Chemistry, University of Wisconsin-Madison, 777 Highland Avenue, Madison, Wisconsin 53705-2222

**E-mail:** [lingjun.li@wisc.edu](mailto:lingjun.li@wisc.edu)

**Fax:** +1-608-262-5345

**Phone:** +1-608-265-8491

and Professor Wei Xu, McArdle Laboratory for Cancer Research, University of Wisconsin, Madison, WI 53705, USA

Email: [wxu@oncology.wisc.edu](mailto:wxu@oncology.wisc.edu)

# These authors contributed equally.

### **Table of Contents:**

**Figure S1.** The reporter ions intensity (A), precursor ions intensity (B) and reporter ion yield (C) of glycopeptides and nonglycosylated peptides in the same run.

**Figure S2.** The Venn diagram analysis of (A) intact N-glycopeptides (A) and (B) N-glycosylation sites identified with HILIC and MLA enrichment methods. (C) The comparison of the percentage of sialylated N-glycopeptides enriched between two methods.

**Table S1** The identified N-glycopeptides enriched by HILIC alone, lectin alone and sequential HILIC and lectin enrichment.

**Table S2** Glycoproteomics results between PKM2 knockout cells vs. parental breast cancer cells.

**Table S3** Deglycoproteomics results between PKM2 knockout cells vs. parental breast cancer cells.

**Table S4** Gene ontology analysis results.

Figure S1. Chen et al.

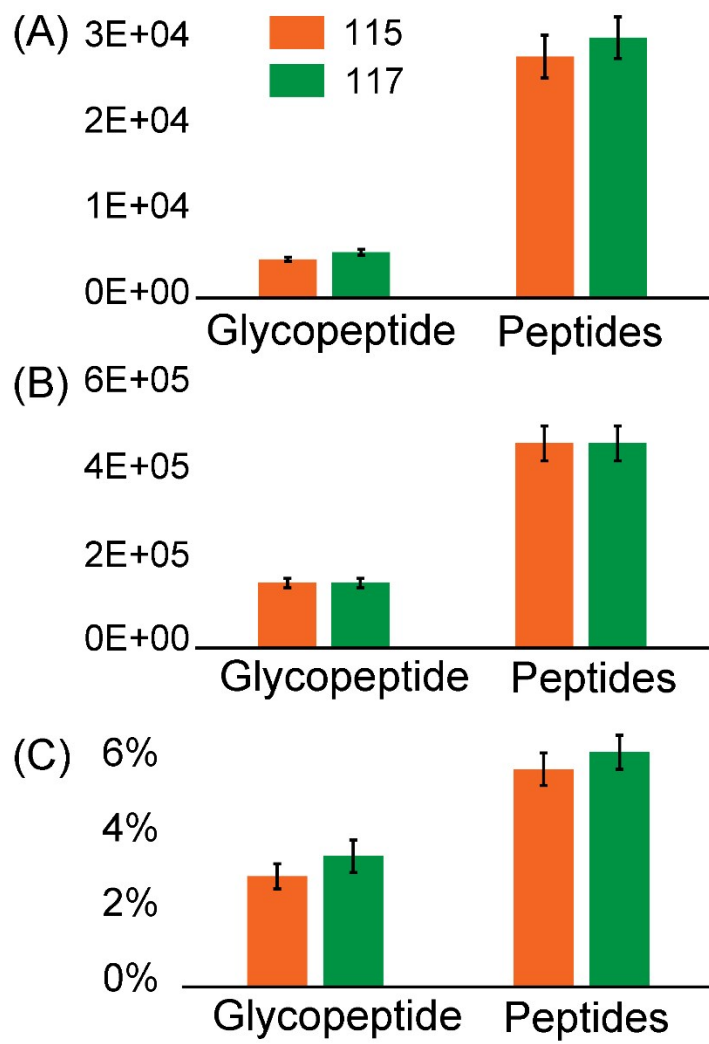

**Figure S1.** The reporter ions intensity (A), precursor ions intensity (B) and reporter ion yield (C) of glycopeptides and nonglycosylated peptides in the same run.

**Figure S2. Chen et al.**

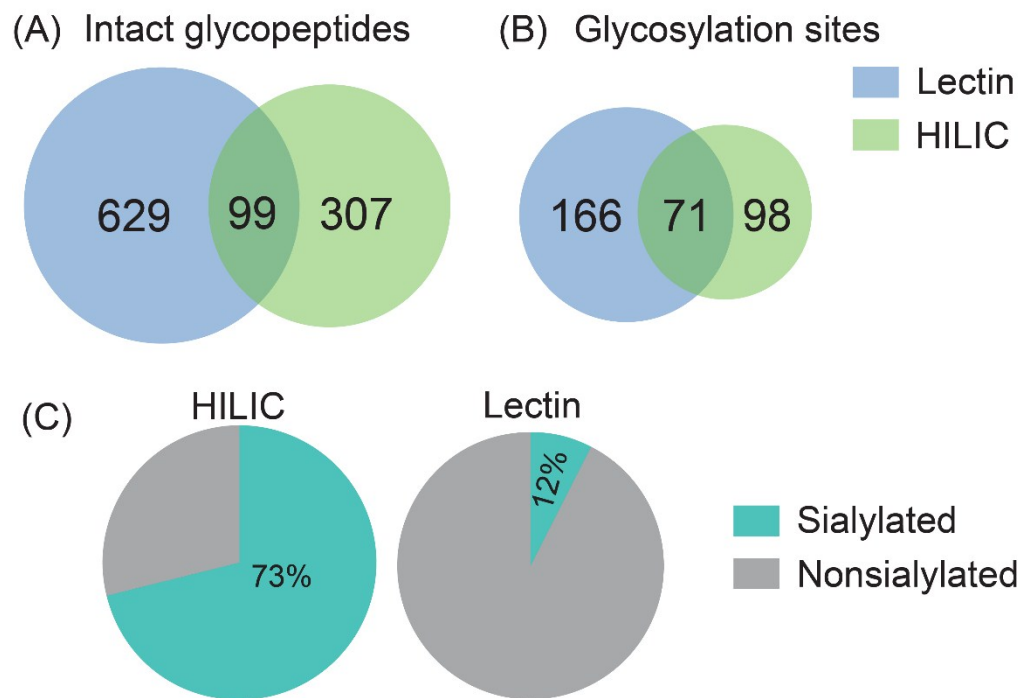

**Figure S2.** The Venn diagram analysis of (A) intact N-glycopeptides (A) and (B) N-glycosylation sites identified with HILIC and MLA enrichment methods. (C) The comparison of the percentage of sialylated N-glycopeptides enriched between two methods.
